# Supplementary material for: Self-assembled zein–sodium carboxymethyl cellulose nanoparticles as an effective drug carrier and transporter
Source: Royal Society of Chemistry journal article supplement (doi:10.1039/c4tb01920b), 2015-01-01
Supplement: c4tb01920b1.pdf [file c4tb01920b1.pdf]

1 **Figure captions:**

2 Hongshan Liang, Huazhong Agriculture University.

3

4 Figure S1. The effect of pH from 2.6 to 11.0 on zein-CMC NPs prepared at zein :  
5 CMC ratio of 1 : 3. Digital photographs and zeta potential of the NPs and CMC with  
6 different pH were shown inset. Data displayed as mean±SD (n=3).

7

8 Figure S2. Fourier transform infrared spectroscopy (FTIR) spectra of different  
9 samples. Zein, zein powder; CMC, sodium carboxymethyl cellulose powder; PTX,  
10 paclitaxel powder; NPs, zein-CMC nanoparticles prepared using zein : CMC ratio of 1 :  
11 3 w/w; PTX-NPs, paclitaxel-loaded zein-CMC nanoparticles prepared using zein :  
12 CMC ratio of 1 : 3 w/w at paclitaxel concentration of 80µg ml<sup>-1</sup>.

13

14 Figure S3. XRD patterns of different samples. Zein, zein powder; PTX, paclitaxel  
15 powder; NPs, zein-CMC nanoparticles prepared using zein : CMC ratio of 1 : 3 w/w;  
16 PTX-NPs, paclitaxel-loaded zein-CMC nanoparticles prepared using zein : CMC ratio  
17 of 1 : 3 w/w at paclitaxel concentration of 80µg ml<sup>-1</sup>.

18

19

20

21

22

23 **Table S1**

24

Table S1 Optimization of zein-CMC NPs.

| Samples   | particle size(nm) | PDI       | Zeta potential(mV) |
|-----------|-------------------|-----------|--------------------|
| Z/CMC 2:1 | 141.0±3.5         | 0.27±0.00 | -50.4±1.68         |
| Z/CMC 1:1 | 166.9±2.1         | 0.27±0.01 | -51.9±0.51         |
| Z/CMC 1:2 | 199.5±4.0         | 0.31±0.02 | -53.6±0.51         |
| Z/CMC 1:3 | 135.3±1.4         | 0.26±0.01 | -54.5±1.36         |
| Z/CMC 1:4 | 208.9±4.2         | 0.27±0.01 | -58.3±0.59         |

25 Samples represent formulations with different mass ratios of zein-CMC.PDI, polydispersity. Data

26 displayed as mean ± SD (n=3).

27

28

29

30

31

32

33

34

35

36

37

38

39

40

41 **Table S2**

42 Table S2 IC<sub>50</sub> of HeLa and HepG2 cells after 24h or 48h of incubation with free PTX  
 43 and PTX-NPs

| Group   |       | IC <sub>50</sub> (μg/mL) |                |
|---------|-------|--------------------------|----------------|
|         |       | 24 h                     | 48 h           |
| PTX     | HeLa  | 1.85 ± 0.19              | 0.07 ± 0.01    |
|         | HepG2 | 0.39 ± 0.03              | 0.02 ± 0.01    |
| PTX-NPs | HeLa  | 2.98 ± 0.32**            | 0.17 ± 0.01*** |
|         | HepG2 | 1.46 ± 0.16***           | 0.38 ± 0.05*** |

44 Data displayed as mean ± SD (n=3). \*\*p < 0.01; \*\*\*p < 0.001; versus PTX group.

45  
46  
47  
48  
49  
50  
51  
52  
53  
54  
55  
56  
57  
58  
59  
60  
61  
62  
63  
64  
65  
66  
67  
68  
69  
70  
71  
72  
73  
74  
75  
76  
77

78 **Figure S1.**

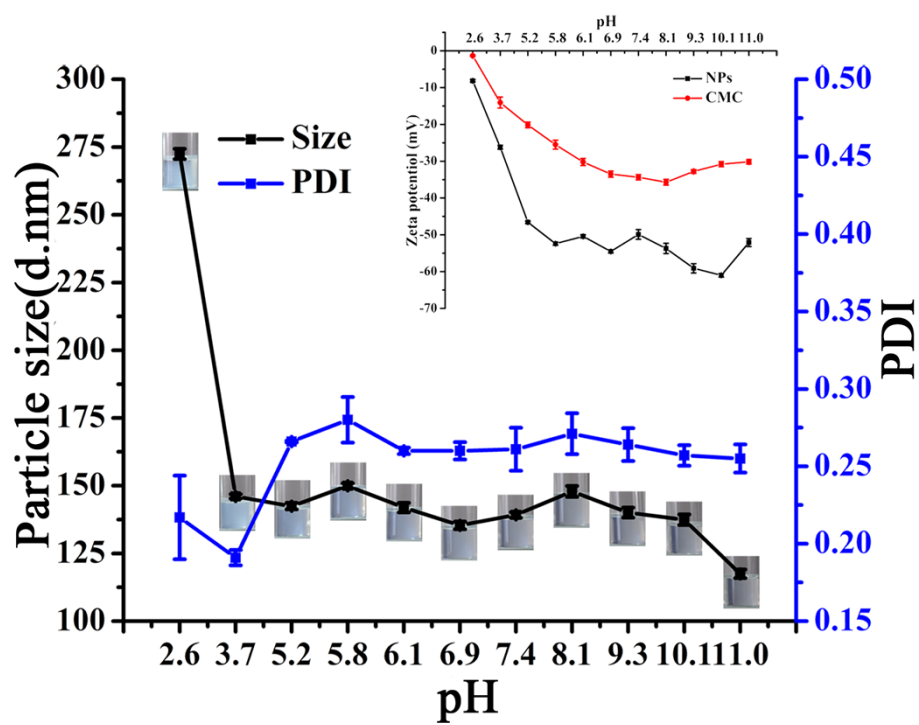

79  
80  
81  
82  
83  
84  
85  
86  
87  
88  
89  
90  
91  
92  
93  
94  
95  
96  
97  
98  
99  
100  
101  
102  
103  
104

105 **Figure S2.**

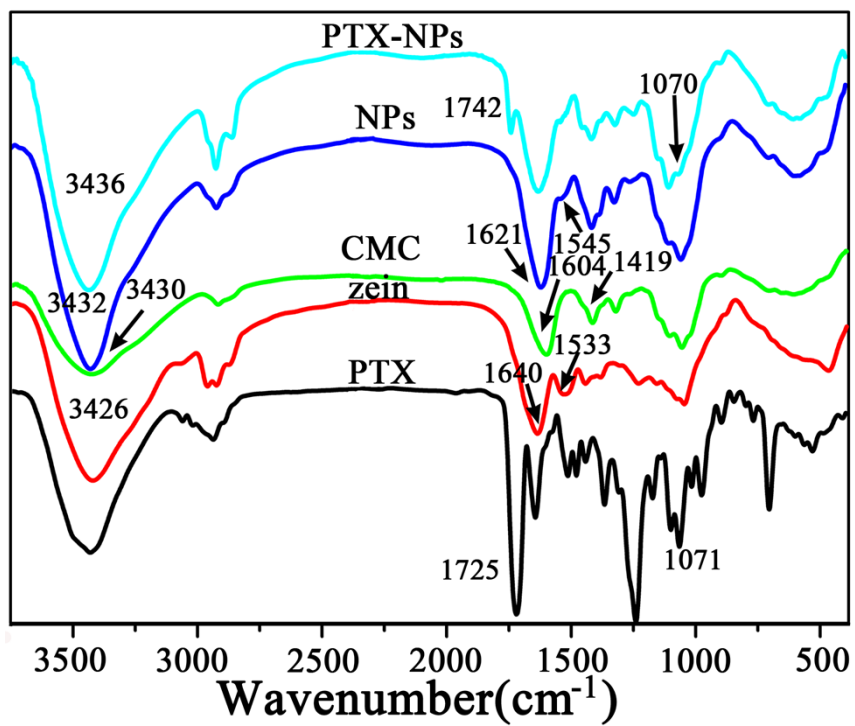

106

107

108

109

110

111

112

113

114

115

116

117

118

119

120

121

122

123

124 **Figure S3.**

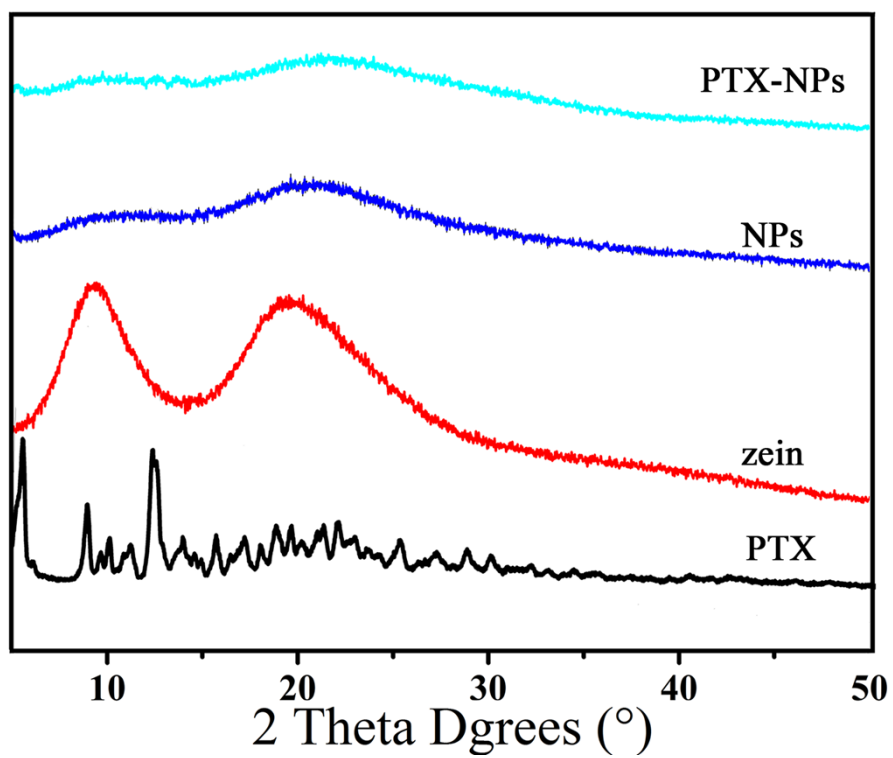

125  
126  
127  
128  
129  
130  
131  
132  
133  
134  
135  
136  
137  
138  
139  
140  
141  
142  
143  
144
